# Supplementary material
Source: HighWire-hosted journal article supplement (http://www.ajnr.org/highwire/filestream/719/field_highwire_adjunct_files/0/16-00527.pdf)
Supplement: 16-00527.pdf [file 16-00527.pdf]

**On-line Table 1: Comparison of peak velocity and volume flow rates in the major cerebral arteries between patients with ICAD and healthy volunteers**

| Cerebral Arteries | Peak Velocity (m/s)         |                     |                    | Volume Flow Rate (mL/s)     |                     |                    |
|-------------------|-----------------------------|---------------------|--------------------|-----------------------------|---------------------|--------------------|
|                   | Patients with ICAD (n = 22) | Volunteers (n = 10) | P Value            | Patients with ICAD (n = 22) | Volunteers (n = 10) | P Value            |
| Left ICA          | 0.45 ± 0.11                 | 0.48 ± 0.07         | .4463              | 2.94 ± 1.10                 | 3.79 ± 0.57         | .0201 <sup>a</sup> |
| Right ICA         | 0.62 ± 0.15                 | 0.51 ± 0.09         | .046 <sup>a</sup>  | 4.48 ± 1.17                 | 3.94 ± 0.58         | .2550              |
| Left ACA          | 0.48 ± 0.17                 | 0.47 ± 0.10         | .6320              | 1.44 ± 0.82                 | 1.37 ± 0.51         | .9134              |
| Right ACA         | 0.45 ± 0.11                 | 0.47 ± 0.07         | .5864              | 1.67 ± 1.02                 | 1.39 ± 0.56         | .6477              |
| Left MCA          | 0.45 ± 0.11                 | 0.66 ± 0.12         | .0005 <sup>b</sup> | 1.64 ± 0.64                 | 2.73 ± 0.65         | .0005 <sup>b</sup> |
| Right MCA         | 0.62 ± 0.18                 | 0.63 ± 0.08         | .6547              | 2.98 ± 1.03                 | 2.76 ± 0.68         | .6256              |
| Left PCA          | 0.42 ± 0.20                 | 0.45 ± 0.07         | .2304              | 1.65 ± 1.09                 | 1.40 ± 0.54         | .7297              |
| Right PCA         | 0.39 ± 0.13                 | 0.44 ± 0.07         | .1082              | 1.23 ± 0.63                 | 1.41 ± 0.57         | .4279              |
| BA                | 0.50 ± 0.21                 | 0.54 ± 0.18         | .6572              | 2.77 ± 1.67                 | 2.50 ± 0.94         | .8327              |

<sup>a</sup> Statistical significance between patients with ICAD and healthy volunteers with a P value < .05 (Mann-Whitney U test).

<sup>b</sup> Statistical significance between patients with ICAD and healthy volunteers with a P value < .01 (Mann-Whitney U test).

**On-line Table 2: Comparison of peak velocity and volume flow rates in the major cerebral arteries between patients with ICAD with ICA stenosis and healthy volunteers**

| Cerebral Arteries | Peak Velocity (m/s)                          |                     |                    | Volume Flow Rate (mL/s)                      |                     |                    |
|-------------------|----------------------------------------------|---------------------|--------------------|----------------------------------------------|---------------------|--------------------|
|                   | Patients with ICAD with ICA Stenosis (n = 7) | Volunteers (n = 10) | P Value            | Patients with ICAD with ICA Stenosis (n = 7) | Volunteers (n = 10) | P Value            |
| Affected-side ICA | 0.37 ± 0.10                                  | 0.48 ± 0.07         | .0575              | 2.22 ± 1.02                                  | 3.79 ± 0.57         | .0048 <sup>a</sup> |
| Contralateral ICA | 0.67 ± 0.14                                  | 0.51 ± 0.09         | .0248 <sup>b</sup> | 5.68 ± 1.04                                  | 3.94 ± 0.58         | .0031 <sup>a</sup> |
| Affected-side ACA | 0.42 ± 0.10                                  | 0.47 ± 0.10         | .1855              | 0.83 ± 0.45                                  | 1.37 ± 0.51         | .0719              |
| Contralateral ACA | 0.48 ± 0.14                                  | 0.47 ± 0.07         | .9157              | 2.25 ± 1.42                                  | 1.39 ± 0.56         | .1858              |
| Affected-side MCA | 0.48 ± 0.11                                  | 0.66 ± 0.12         | .0128 <sup>b</sup> | 1.76 ± 0.79                                  | 2.73 ± 0.65         | .0318 <sup>b</sup> |
| Contralateral MCA | 0.69 ± 0.16                                  | 0.63 ± 0.08         | .6605              | 3.25 ± 0.82                                  | 2.76 ± 0.68         | .1613              |
| Affected-side PCA | 0.54 ± 0.27                                  | 0.45 ± 0.07         | .6605              | 2.34 ± 1.41                                  | 1.40 ± 0.54         | .1571              |
| Contralateral PCA | 0.44 ± 0.14                                  | 0.44 ± 0.07         | .6256              | 1.52 ± 0.79                                  | 1.41 ± 0.57         | .7396              |
| BA                | 0.67 ± 0.24                                  | 0.54 ± 0.18         | .2225              | 3.95 ± 1.91                                  | 2.50 ± 0.94         | .0878              |

<sup>a</sup> Statistical significance between patients with ICAD with ICA stenosis and healthy volunteers with P < .01 (Mann-Whitney U test).

<sup>b</sup> Statistical significance between patients with ICAD with ICA stenosis and healthy volunteers with P < .05 (Mann-Whitney U test).

**On-line Table 3: Comparison of peak velocity and volume flow rates in the major cerebral arteries between patients with ICAD with MCA stenosis and healthy volunteers**

| Cerebral Arteries | Peak Velocity (m/s)                          |                     |                    | Volume Flow Rate (mL/s)                      |                     |                    |
|-------------------|----------------------------------------------|---------------------|--------------------|----------------------------------------------|---------------------|--------------------|
|                   | Patients with ICAD with MCA Stenosis (n = 9) | Volunteers (n = 10) | P Value            | Patients with ICAD with MCA Stenosis (n = 9) | Volunteers (n = 10) | P Value            |
| Affected-side ICA | 0.45 ± 0.09                                  | 0.48 ± 0.07         | .6771              | 3.01 ± 0.93                                  | 3.79 ± 0.57         | .0284 <sup>a</sup> |
| Contralateral ICA | 0.57 ± 0.10                                  | 0.51 ± 0.09         | .1809              | 4.43 ± 0.89                                  | 3.94 ± 0.58         | .2230              |
| Affected-side ACA | 0.55 ± 0.19                                  | 0.47 ± 0.10         | .6759              | 1.80 ± 0.91                                  | 1.37 ± 0.51         | .3702              |
| Contralateral ACA | 0.47 ± 0.09                                  | 0.47 ± 0.07         | .9092              | 1.38 ± 0.55                                  | 1.39 ± 0.56         | .9394              |
| Affected-side MCA | 0.44 ± 0.13                                  | 0.66 ± 0.12         | .0037 <sup>b</sup> | 1.38 ± 0.42                                  | 2.73 ± 0.65         | .0003 <sup>b</sup> |
| Contralateral MCA | 0.69 ± 0.18                                  | 0.63 ± 0.08         | .3979              | 3.31 ± 1.06                                  | 2.76 ± 0.68         | .2512              |
| Affected-side PCA | 0.43 ± 0.14                                  | 0.45 ± 0.07         | .7513              | 1.80 ± 0.99                                  | 1.40 ± 0.54         | .3494              |
| Contralateral PCA | 0.43 ± 0.14                                  | 0.44 ± 0.07         | .6985              | 1.35 ± 0.72                                  | 1.41 ± 0.57         | .9159              |
| BA                | 0.48 ± 0.17                                  | 0.54 ± 0.18         | .5731              | 2.97 ± 1.69                                  | 2.50 ± 0.94         | .5731              |

<sup>a</sup> Statistical significance between patients with ICAD with MCA stenosis and healthy volunteers with P < .05 (Mann-Whitney U test).

<sup>b</sup> Statistical significance between patients with ICAD with MCA stenosis and healthy volunteers with P < .01 (Mann-Whitney U test).

**On-line Table 4: Comparison of peak velocity and volume flow rates in the major cerebral arteries between patients with ICAD with BA stenosis and healthy volunteers**

| Cerebral Arteries | Peak Velocity (m/s)                         |                     |                    | Volume Flow Rate (mL/s)                     |                     |                    |
|-------------------|---------------------------------------------|---------------------|--------------------|---------------------------------------------|---------------------|--------------------|
|                   | Patients with ICAD with BA Stenosis (n = 6) | Volunteers (n = 10) | P Value            | Patients with ICAD with BA Stenosis (n = 6) | Volunteers (n = 10) | P Value            |
| Left ICA          | 0.53 ± 0.10                                 | 0.48 ± 0.07         | .4795              | 3.45 ± 1.16                                 | 3.79 ± 0.57         | .5876              |
| Right ICA         | 0.68 ± 0.21                                 | 0.51 ± 0.09         | .0652              | 3.59 ± 0.76                                 | 3.94 ± 0.58         | .3676              |
| Left ACA          | 0.39 ± 0.08                                 | 0.47 ± 0.10         | .1945              | 1.25 ± 0.55                                 | 1.37 ± 0.51         | .8639              |
| Right ACA         | 0.41 ± 0.12                                 | 0.47 ± 0.07         | .2721              | 1.45 ± 0.83                                 | 1.39 ± 0.56         | .8639              |
| Left MCA          | 0.47 ± 0.07                                 | 0.66 ± 0.12         | .0079 <sup>a</sup> | 1.94 ± 0.53                                 | 2.73 ± 0.65         | .0075 <sup>a</sup> |
| Right MCA         | 0.47 ± 0.10                                 | 0.63 ± 0.08         | .0092 <sup>a</sup> | 1.98 ± 0.48                                 | 2.76 ± 0.68         | .0420 <sup>b</sup> |
| Left PCA          | 0.29 ± 0.05                                 | 0.45 ± 0.07         | .0017 <sup>a</sup> | 0.77 ± 0.32                                 | 1.40 ± 0.54         | .0420 <sup>b</sup> |
| Right PCA         | 0.29 ± 0.06                                 | 0.44 ± 0.07         | .0034 <sup>a</sup> | 0.78 ± 0.29                                 | 1.41 ± 0.57         | .0160 <sup>b</sup> |
| BA                | 0.36 ± 0.14                                 | 0.54 ± 0.18         | .0500              | 1.17 ± 0.69                                 | 2.50 ± 0.94         | .0127 <sup>b</sup> |

<sup>a</sup> Statistical significance between patients with ICAD with BA stenosis and healthy volunteers with  $P < .01$  (Mann-Whitney  $U$  test).

<sup>b</sup> Statistical significance between patients with ICAD with BA stenosis and healthy volunteers with  $P < .05$  (Mann-Whitney  $U$  test).
